# Supplementary material
Source: PubMed Central journal article supplement (PMC2435513)
Supplement: NIHMS49685-supplement-2.pdf [file NIHMS49685-supplement-2.pdf]

## Supplementary Figure Legends

**Suppl. Figure 1. Cholesterol absorption is not different in *Ire1b*<sup>+/+</sup> and *Ire1b*<sup>-/-</sup> mice as measured by dual-isotope labeling method.** Wild-type *Ire1b*<sup>+/+</sup> (+/+; *open bars*) and *Ire1b*<sup>-/-</sup> (-/-; *closed bars*) male mice were fed a chow diet supplemented with 2% w/w cholesterol (three per group) diet for two weeks. After 2 weeks, mice were placed in individual cages that had wire mesh floors. Animals were fasted for 6 h and gavaged with a mixture of 0.2 μCi of [<sup>3</sup>H]sitostanol and 0.1 μCi of [<sup>14</sup>C]cholesterol in 15 μl of olive oil. Feces were collected for 48 h and used for cholesterol absorption studies using dual-isotope ratio method (Wang and Carey, 2003; Carter et al., 1997; Sehayek et al., 1998). Values are mean ± SD.

**Suppl. Figure 2. Effect of deletion or overexpression of IRE1β on different genes involved in ER stress response and lipid metabolism.** Panel A-D: Total RNA from the intestine and liver of high cholesterol and high-fed *Ire1b*<sup>+/+</sup> and *Ire1b*<sup>-/-</sup> mice were isolated and used for the quantification of mRNA of various proteins involved in lipid metabolism and ER stress response. Panel E: Human hepatoma (Huh7) cells were transfected with different c-myc-tagged IRE1β expression plasmids. Total RNA were isolated and used to measure mRNA levels of different genes. The gene/ARPP0 ratios in cells transfected with pcDNA3.1 were used for normalization. Values are mean ± SD.

**Suppl. Figure 3. MTP protein is increased in the intestine but not in the liver of *Ire1b*<sup>-/-</sup> mice.** Intestinal and liver samples from *Ire1b*<sup>+/+</sup> and *Ire1b*<sup>-/-</sup> mice fed a high fat diet (Panels A and B) were Western blotted using using Alexa Flour. Bands were

quantified using Scion Image and plotted as MTP/GAPDH ratios (Panels C and D).

Values are mean  $\pm$  SD.

**Suppl. Figure 4. Increasing amounts of MTP secrete more apoB48.** COS-7 cells, grown in a 6-well plates, were co-transfected with 1  $\mu$ g of human apoB48 and various amounts of MTP-FLAG expression plasmids for 48 h. Cells were washed and incubated with fresh media containing oleic acid:bovine serum albumin (0.2 mM:0.5% w/v) complexes for 17 h. Media were collected and used to measure apoB secretion (Hussain et al., 1995; Bakillah et al., 1997) by ELISA (Panel A). Values are mean  $\pm$  SD. ApoB48 was also immunoprecipitated from media and used for Western blotting (Panel B, apoB48). Cellular homogenates were used to measure MTP and GAPDH levels (Panel B).

Suppl. Figure 1

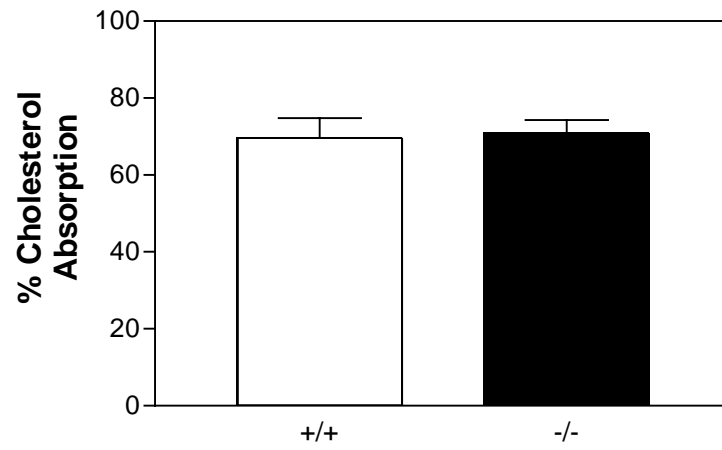

Suppl. Figure 2

## High Cholesterol Diet

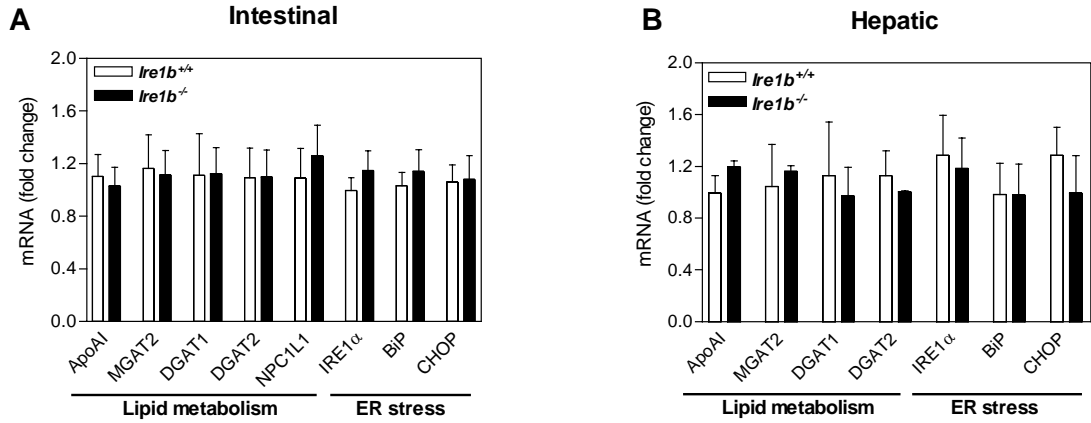

## High Fat Diet

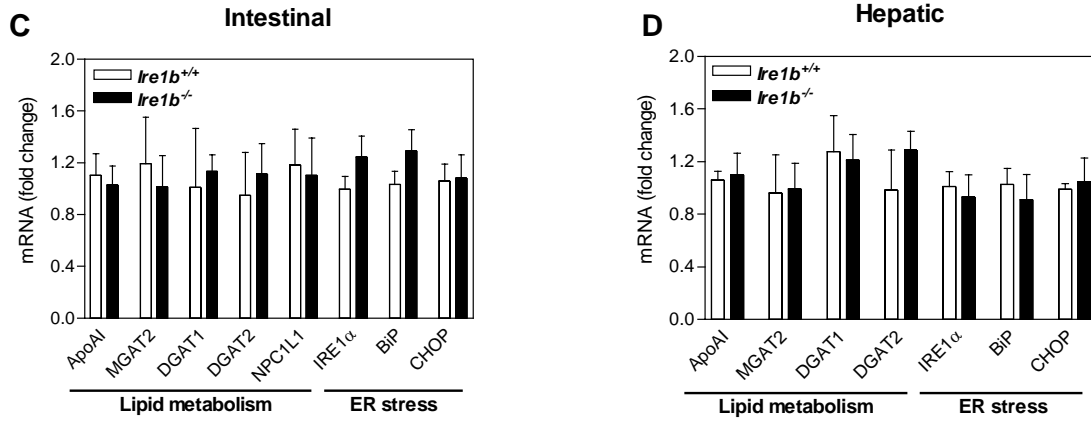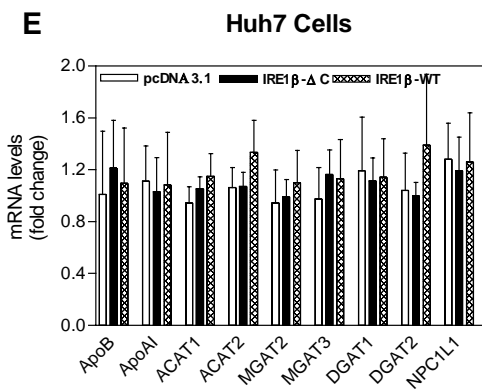

Suppl. Fig. 3

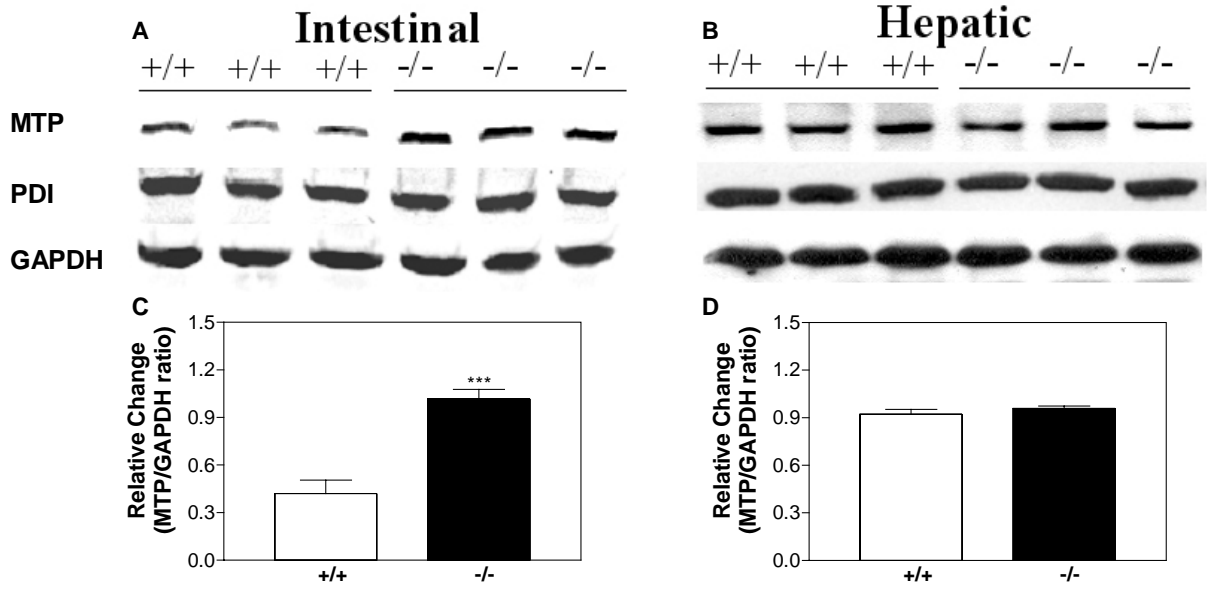

Suppl. Figure 4

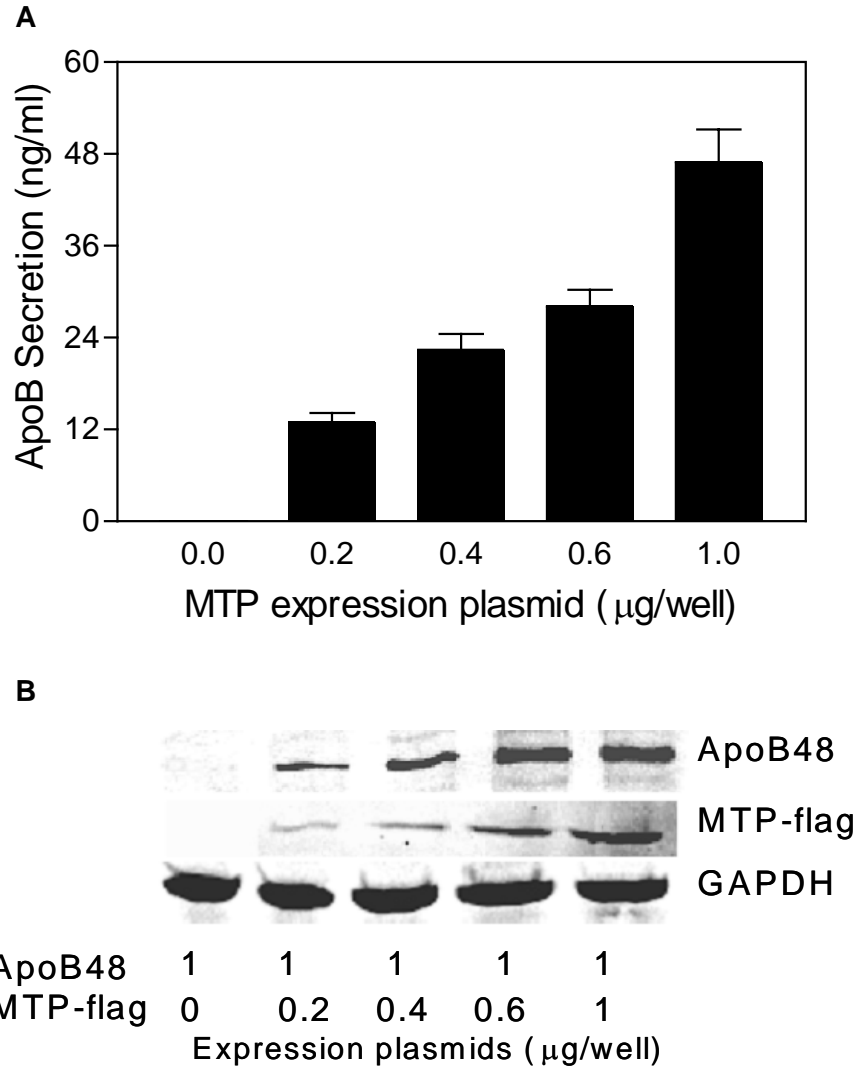

**Table S1.** Primer pairs used for qPCR studies and detection of XBP-1.

| <b>Gene ID</b>         | <b>5' primer</b>             | <b>3' primer</b>           |
|------------------------|------------------------------|----------------------------|
| ARPP0, human           | GTCCAACACTTCCTTAAGATCATCCA   | ACATGCGGATCTGCTGCAT        |
| ARPP0, mouse           | GTCCAACACTTCCTCAAGATCATCCA   | ACATGCGGATCTGCTGCAT        |
| MTP, human (exon 1-2)  | TGTGCTTTTTCTCTGCTTCATTTT     | GCTTGTACAGCCGGTCATTATTT    |
| MTP, human (exon 7-8)  | ACGGCCATTCCCATTGTG           | GCCAGAGCTCCGAGAGAGAA       |
| MTP, mouse             | CACACAACCTGGCCTCTCATTAAAT    | TGCCCCATCAAGAAACACT        |
| PDI, human             | CGGCTTCCCCAAGGA              | TGCGCTTCTCAGCCAGTT         |
| NPC1L1, human          | CGACTGGAAGGACCATTTTCTG       | GCTGTGCCATCCTTGAAGGT       |
| ApoB, human            | GCAAGCAGAAGCCAGAAGTG         | CCATTGGAGAAGCAGTTTG        |
| ApoB, mouse            | GATCAGGCTTTGCCGCAATA         | CATCAGAGGAGAGGCCAATCC      |
| ApoA1, human           | GGCAGAGACTATGTGTCCCAGTT      | CCAGTTGTCAAGGAGCTTTAGGTT   |
| ApoA1, mouse           | GGCCGTGGCTCTGGTCTT           | GGTTCATCTTGCTGCCATACG      |
| ACAT1, human           | TTGAAGGAAGTGGTCATAGTAAGTGCTA | TGGCTGGCAGCAAGGAA          |
| ACAT1, human           | AGGAGACTCCAGCATTGTGGTT       | CCTGTCTCAAGTAAGCCAAGTGA    |
| MGAT2, human           | GACCCCTCTCGGAACACTATTG       | CGGAACCACAAGGTCAGCAT       |
| MGAT2, mouse           | ACCTTCGCGGTCCTTCAGT          | CTTGTCAGTCCAGGTACCA        |
| MGAT3, human           | ACTCTGGCCCTTCTCTGTTTTT       | AACGCCTCCACCTTGTTT         |
| DGAT1, human           | GATGTTCCAGTTCTGCCAGAAGT      | GATGTTCCAGTTCTGCCAGAAGT    |
| DGAT1, mouse           | GTTTCAGCTCAGACAGTGGTTTCA     | TCAGCATCACACACACCAA        |
| DGAT2, human           | GCTCCATGCCTGGCAAGA           | CAGGGCCAGTTTCACAAAGC       |
| DGAT2, mouse           | AGCTGCAGGTCATCTCAGTACTACA    | CTGCAGGCCACTCCTAGCA        |
| IRE1 $\alpha$ , human  | GCAGCCTGTATACGCTTGGA         | TGCACCAATTCTGGGATGGT       |
| IRE1 $\alpha$ , mouse  | GCCCCGGGAGTTTTGG             | GGGTCGAGACAAACAACAAGGT     |
| IRE1 $\beta$ , human   | CTCCAGTTCGCGGGCCTGCT         | GGTGGACACCAGCAGGAGGTTCTCT  |
| IRE1 $\beta$ , mouse   | CTGCAGCTTGTGACGTTGCT         | GGTAGACACAAACAGAAGGCTCTCT  |
| BiP, human             | GCCATGGTTCTCACTAAAATGAAA     | AACAACCTGCATGGGTAACCTTCTT  |
| BiP, mouse             | CGGACGCACTTGAATGAC           | AACCACCTGAATGGCAAGAA       |
| CHOP, human            | CCTGGAAATGAAGAGGAAGAATCA     | TCAGTCAGCAAGCCAGAGA        |
| CHOP, mouse            | CGAAGAGGAAGAATCAAAAACCTT     | GCCCTGGCTCCTCTGTCA         |
| Ski2, human            | ACTGGGAGCTGCTGAACTTG         | CCATGGGGAAGGCTACTCTC       |
| XRN1, human            | GATGGATCTCAGAGCGGTATCC       | CAGGTACAAGTTGTCAAATTCAGGAA |
| XRN2, human            | CGCAAGTACCCGTCCATCA          | CTGGAATCTTACACCATTGCATT    |
| GAPDH, mouse           | GCAGTGGCAAAGTGGAGATTG        | GTGAGTGGAGTCATACTGGAACATG  |
| XBP-1, mouse and human | GGCCGGTCTGCTGAGT             | TCCTTCTGGGTAGACCTCTGGGA    |

Reference List

Bakillah,A., Zhou,Z., Luchoomun,J., and Hussain,M.M. (1997). Measurement of apolipoprotein B in various cell lines: correlation between intracellular levels and rates of secretion. *Lipids* 32, 1113-1118.

Carter,C.P., Howles,P.N., and Hui,D.Y. (1997). Genetic variation in cholesterol absorption efficiency among inbred strains of mice. *J. Nutr.* 127, 1344-1348.

Hussain,M.M., Zhao,Y., Kancha,R.K., Blackhart,B.D., and Yao,Z. (1995). Characterization of recombinant human apoB-48-containing lipoproteins in rat hepatoma McA-RH7777 cells transfected with apoB48 cDNA: Overexpression of apoB-48 decreases synthesis of endogenous apoB-100. *Arterioscler. Thromb. Vasc. Biol.* 15, 485-494.

Sehayek,E., Ono,J.G., Shefer,S., Nguyen,L.B., Wang,N., Batta,A.K., Salen,G., Smith,J.D., Tall,A.R., and Breslow,J.L. (1998). Biliary cholesterol excretion: a novel mechanism that regulates dietary cholesterol absorption. *Proc. Natl. Acad. Sci. U. S. A.* 95, 10194-10199.

Wang,D.Q. and Carey,M.C. (2003). Measurement of intestinal cholesterol absorption by plasma and fecal dual-isotope ratio, mass balance, and lymph fistula methods in the mouse: an analysis of direct versus indirect methodologies. *J. Lipid Res.* 44, 1042-1059.
